# Supplementary material for: Elucidation of the Metabolite Profile of Yucca gigantea and Assessment of Its Cytotoxic, Antimicrobial, and Anti-Inflammatory Activities
Source: MDPI journal article supplement (doi:10.3390/molecules27041329), 2022-02-16
Supplement: s1 [file s1]

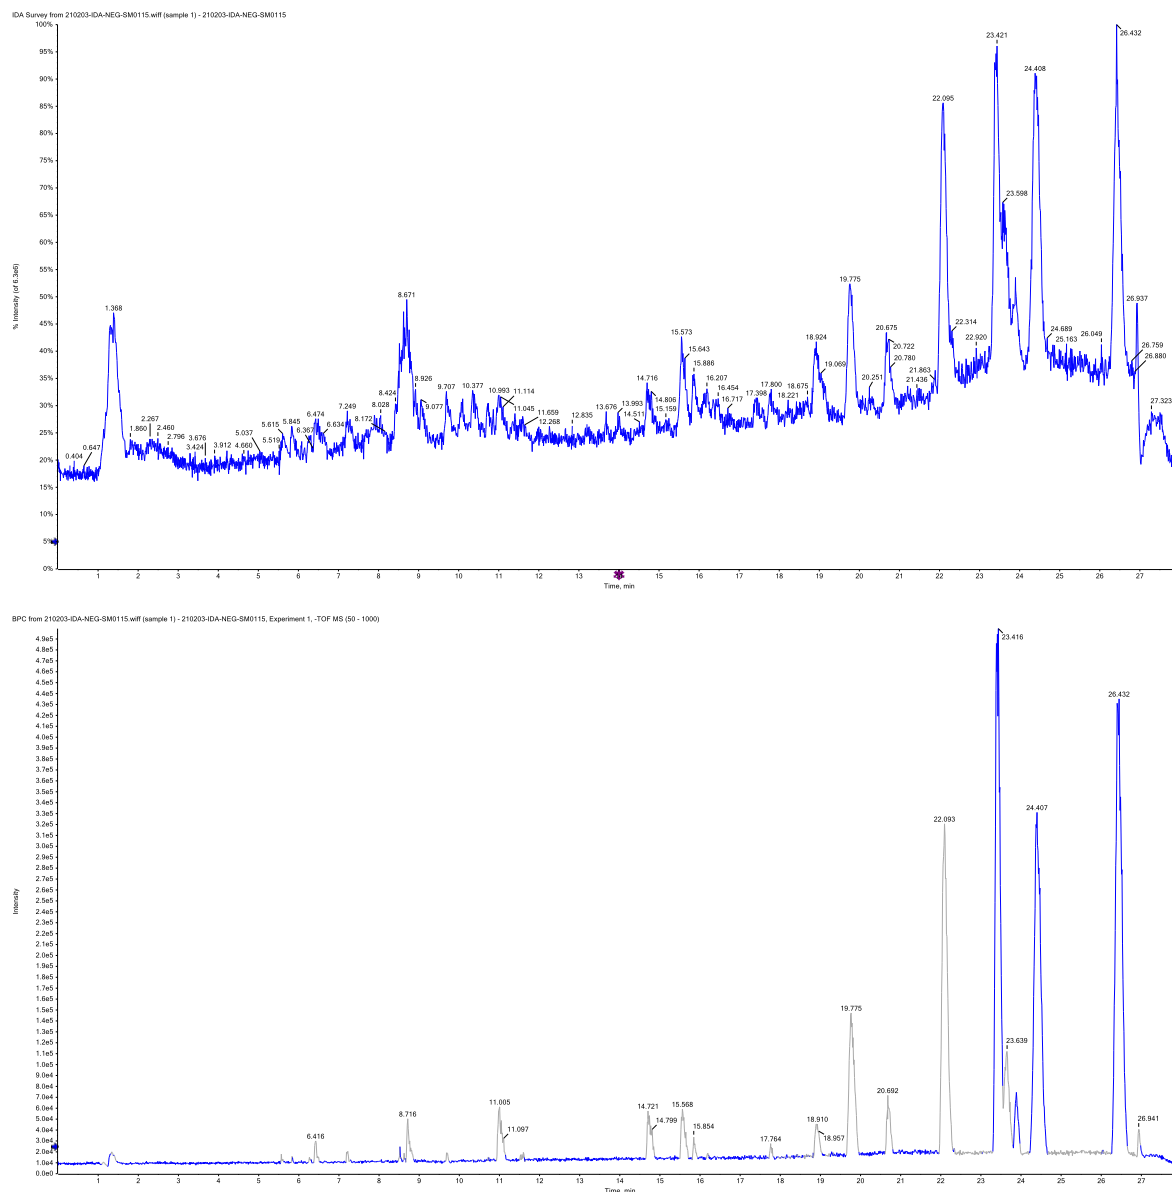

**Figure S1:** TIC and BPC of LC-ESI-MS/MS analysis of *Yucca gigantea* methanol extract in negative ionization mode

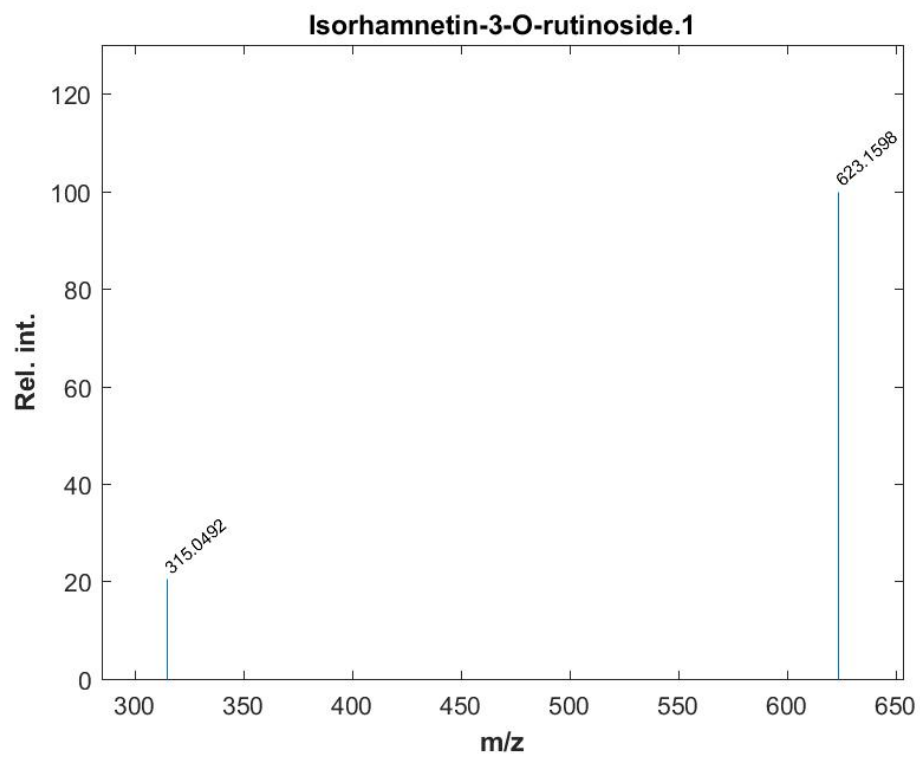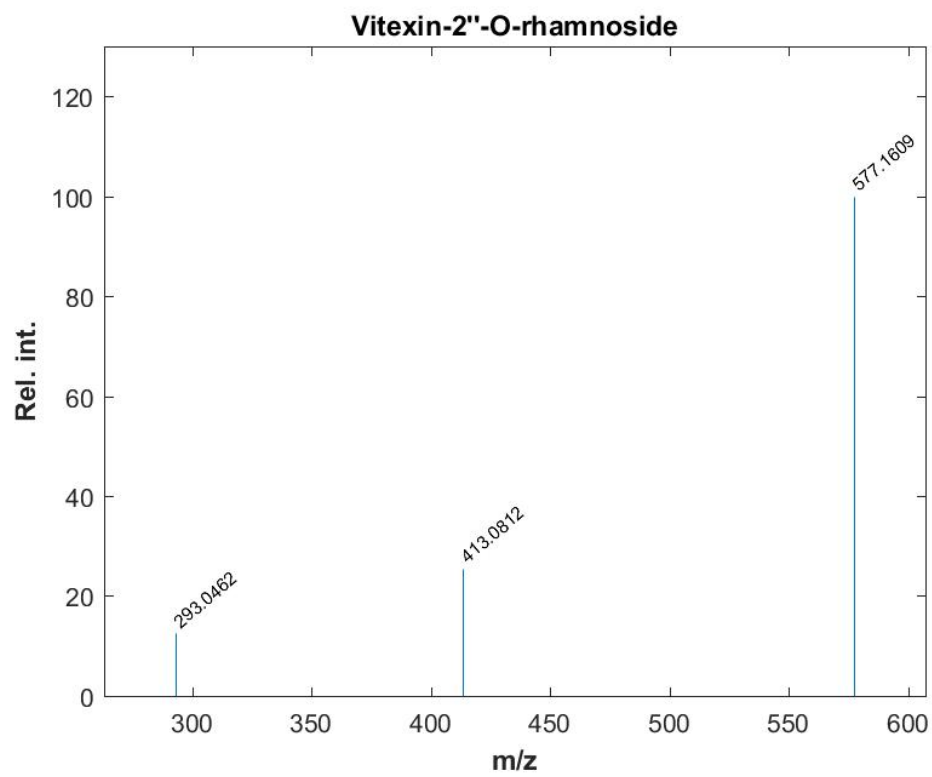

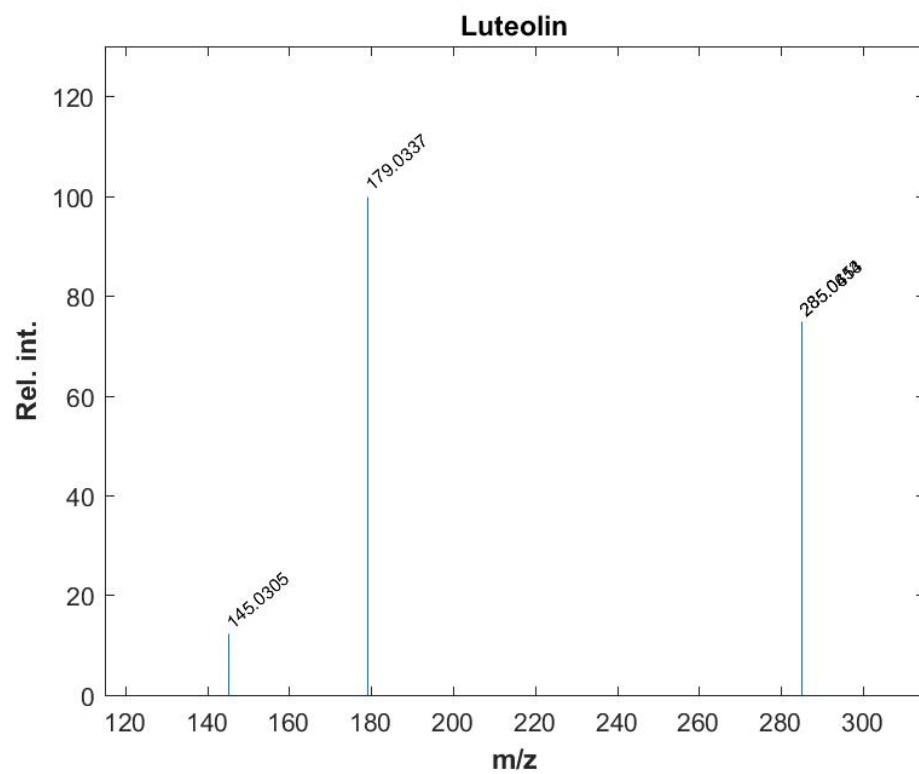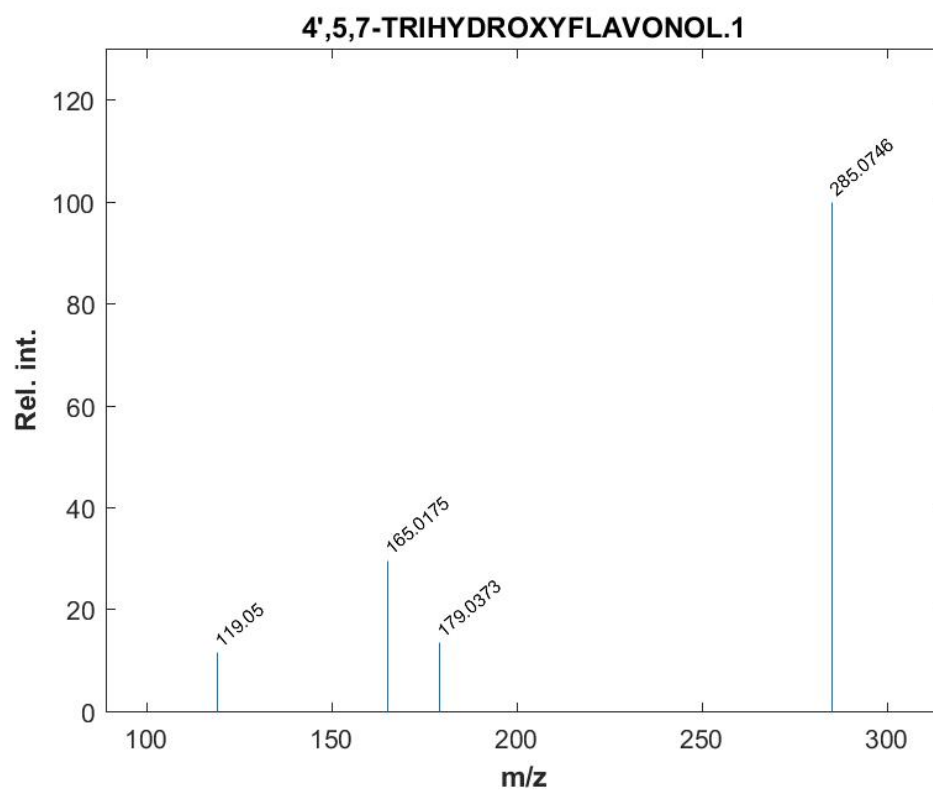

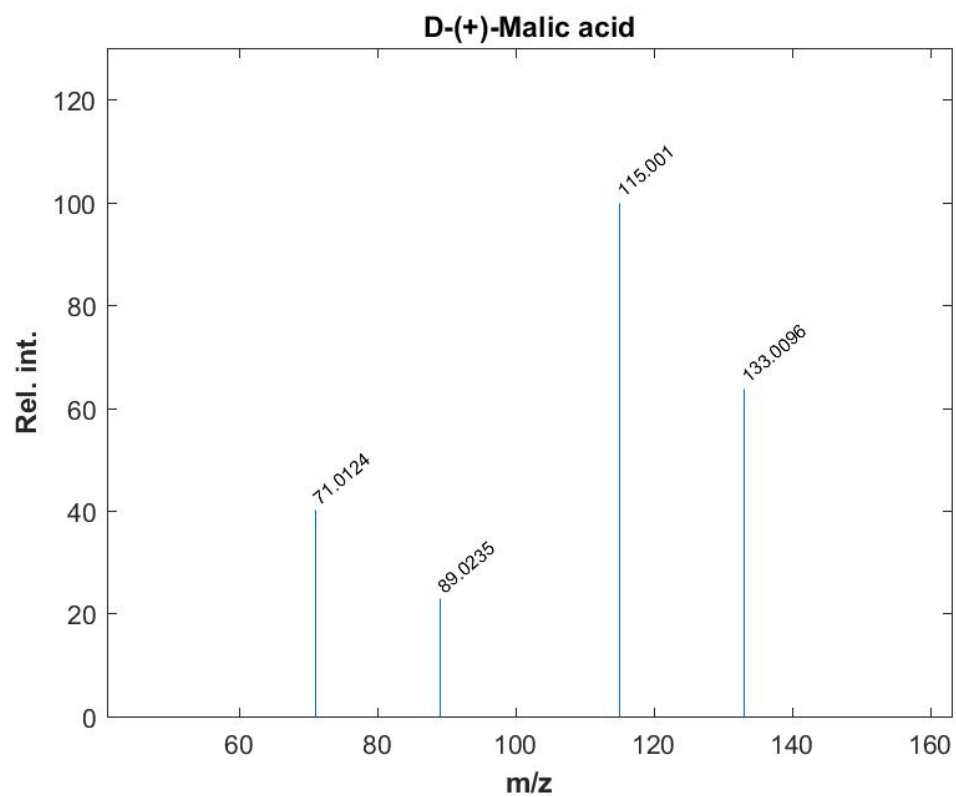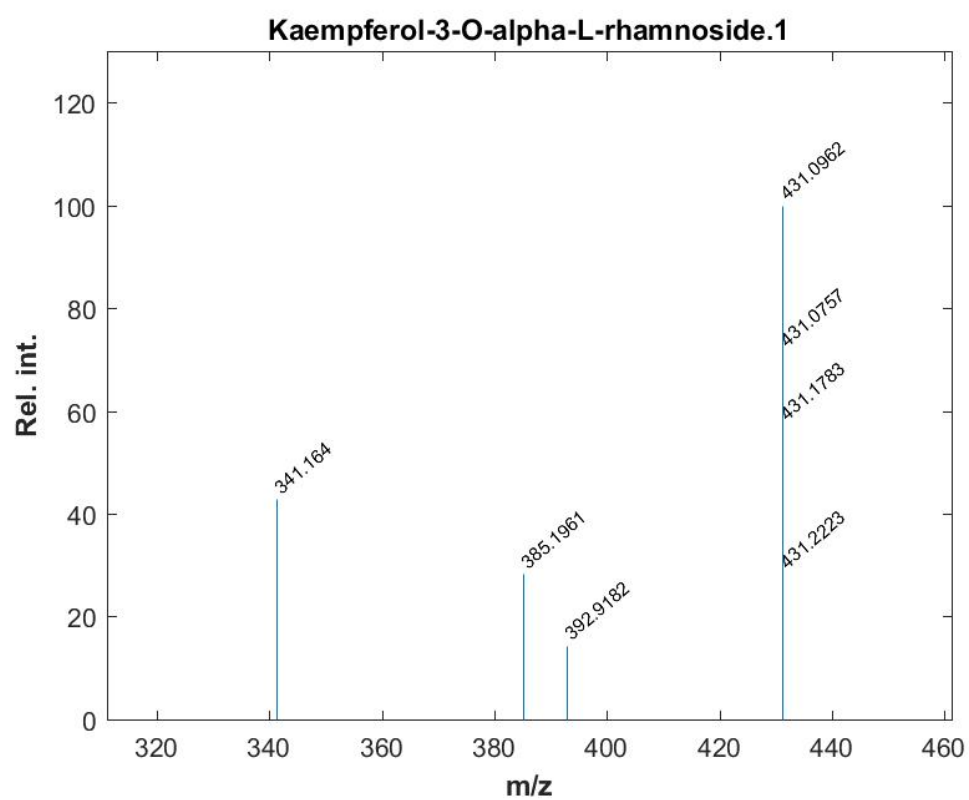

**Figure S2:** The MS/MS spectrum of the major identified compounds.

**Table S1.**  $^1\text{H}$  NMR (DMSO- $d_6$ , 400 MHz) and  $^{13}\text{C}$  NMR (DMSO- $d_6$ , 100 MHz) for the isolated pure compounds.

|            | Compound I<br>Luteolin- 7- <i>O</i> - $\beta$ -D-glucoside |                  | Compound II<br>Apigenin- 7- <i>O</i> - $\beta$ -D-glucoside |                  | Compound III<br>Kaempferol-3- <i>O</i> - $\alpha$ -L-rhamnoside |                  |
|------------|------------------------------------------------------------|------------------|-------------------------------------------------------------|------------------|-----------------------------------------------------------------|------------------|
|            | $\delta\text{H}$                                           | $\delta\text{C}$ | $\delta\text{H}$                                            | $\delta\text{C}$ | $\delta\text{H}$                                                | $\delta\text{C}$ |
| <b>2</b>   |                                                            | 164.6            |                                                             | 163.0            |                                                                 | 157.7            |
| <b>3</b>   | 6.77 (s)                                                   | 103.3            | 6.83 (s)                                                    | 103.2            |                                                                 | 133.5            |
| <b>4</b>   |                                                            | 181.9            |                                                             | 182.1            |                                                                 | 178.2            |
| <b>5</b>   |                                                            | 161.2            |                                                             | 161.5            |                                                                 | 161.7            |
| <b>6</b>   | 6.44 (d $J = 2.4$ )                                        | 99.6             | 6.45 (d, $J = 2.0$ )                                        | 99.6             | 6.21 (d, $J = 1.6$ )                                            | 99.4             |
| <b>7</b>   |                                                            | 163.0            |                                                             | 164.3            |                                                                 | 164.1            |
| <b>8</b>   | 6.78 (d $J = 2.4$ )                                        | 94.8             | 6.93 (d, $J = 2.0$ )                                        | 94.9             | 6.43 (d, $J = 1.6$ )                                            | 94.2             |
| <b>9</b>   |                                                            | 157.0            |                                                             | 161.5            |                                                                 | 154.9            |
| <b>10</b>  |                                                            | 105.4            |                                                             | 105.4            |                                                                 | 104.6            |
| <b>1'</b>  |                                                            | 121.5            |                                                             | 121.1            |                                                                 | 120.9            |
| <b>2'</b>  | 7.45 (d, $J = 2.4$ )                                       | 113.7            | 7.95 (d, $J = 8.0$ )                                        | 128.7            | 7.77 (dd, $J = 8.0, 1.6$ )                                      | 131.0            |
| <b>3'</b>  |                                                            | 145.9            | 6.94 (d, $J = 8.0$ )                                        | 116.1            | 6.92 (dd, $J = 8.0, 1.6$ )                                      | 115.9            |
| <b>4'</b>  |                                                            | 150.0            |                                                             | 161.2            |                                                                 | 160.4            |
| <b>5'</b>  | 6.91 (d, $J = 8.0$ )                                       | 116.1            | 6.94 (d, $J = 8.0$ )                                        | 116.1            | 6.92 (dd, $J = 8.0, 1.6$ )                                      | 115.9            |
| <b>6'</b>  | 7.42 (dd, $J = 8.0, 2.4$ )                                 | 119.3            | 7.95 (d, $J = 8.0$ )                                        | 128.7            | 7.77 (dd, $J = 8.0, 1.6$ )                                      | 131.4            |
| <b>1''</b> | 4.69 (m)                                                   | 99.9             | 5.06 (d, $J = 7.2$ )                                        | 99.9             | 5.29 (s)                                                        | 102.2            |
| <b>2''</b> | 3.71 (m)                                                   | 73.2             | 3.72 (m)                                                    | 73.2             | 3.98 (m)                                                        | 70.6             |
| <b>3''</b> | 4.61 (m)                                                   | 77.2             | 4.60 (m)                                                    | 76.5             | 3.48 (m)                                                        | 70.8             |
| <b>4''</b> | 5.05 (m)                                                   | 69.6             | 5.06 (m)                                                    | 69.6             | 3.15 (m)                                                        | 71.5             |
| <b>5''</b> | 5.11 (m)                                                   | 76.5             | 5.12 (m)                                                    | 77.3             | 3.08 (m)                                                        | 71.1             |
| <b>6''</b> | 5.39 (m)                                                   | 60.7             | 5.38 (m)                                                    | 60.7             | 0.79 (d, $J = 5.6$ )                                            | 17.9             |
